# Supplementary material for: Z-scheme MoS2/Bi2O3 heterojunctions: enhanced photocatalytic degradation performance and mechanistic insight
Source: Royal Society of Chemistry journal article supplement (doi:10.1039/c9nj02521a), 2019-01-01
Supplement: c9nj02521a1.pdf [file c9nj02521a1.pdf]

# **MoS<sub>2</sub>/Bi<sub>2</sub>O<sub>3</sub> heterojunctions in Z-scheme for enhanced separation efficiency of charge carriers and photocatalytic degradation performance**

Rong Ji<sup>a</sup>, Zhi Zhu<sup>a</sup>, Wei Ma<sup>b</sup>, Yang Liu<sup>c</sup>, Yongsheng Yan<sup>a\*</sup>, Changchang Ma<sup>d\*</sup>

- a. Institute of the Green Chemistry and Chemical Technology, School of Chemistry and Chemical Engineering, Jiangsu University, Zhenjiang 212013, P.R. China
- b. Jiangsu United Chemical Co., Ltd., Zhenjiang 212013, P.R. China
- c. School of Physics, Jilin Normal University, Siping 136000, P.R. China
- d. Research Center of Fluid Machinery Engineering and Technology, Institute of the Green Chemistry and Chemical Technology, Jiangsu University, Zhenjiang 212013, P.R. China

## Experimental

### 1. Materials

Sodium molybdate dihydrate ( $\text{Na}_2\text{MoO}_4 \cdot 2\text{H}_2\text{O}$ , 99.5%) was purchased from Aladdin Reagent. Thiocarbamide ( $\text{CS}(\text{NH}_2)_2$ , 99.0%), sodium hydroxide ( $\text{NaOH}$ , 99.8%), bismuth nitrate pentahydrate ( $\text{Bi}(\text{NO}_3)_3 \cdot 5\text{H}_2\text{O}$ , 98.0%), ethanol ( $\text{C}_2\text{H}_5\text{OH}$ ), isopropanol (IPA), triethanolamine (TEOA), Vitamin c (Vc) and 5,5-dimethyl-L-pyrroline N-oxide (DMPO) were all purchased from Sinopharm Chemical Reagent Co., Ltd. All materials were used as received without further purification.

### 2. Synthesis

First, 1.21 g  $\text{Na}_2\text{MoO}_4 \cdot 2\text{H}_2\text{O}$  and 1.56 g  $\text{CS}(\text{NH}_2)_2$  were dissolved in 60 mL distilled water. Then, the mixed solution was stirred for 30 min, and moved to a 100 mL Teflon-lined autoclave. Meanwhile, the mixture was put at 180 °C for 24 h. After that, a black precipitate was achieved by centrifuging, and it was washed using distilled water and absolute ethanol for some times. Then the black precipitate was put into the distilled water and sonicated, and with a centrifugation at 2000 rpm. Finally, the  $\text{MoS}_2$  nanosheets were got and dried at 60 °C for 8 h.

Second, the  $\text{Bi}_2\text{O}_3$  solid rods were attained by a typical synthesis. 4.8 g of  $\text{Bi}(\text{NO}_3)_3 \cdot 5\text{H}_2\text{O}$  was dispersed in 100 mL distilled water stirring for 30 min. Then using  $\text{NaOH}$  (10 M) to adjust the pH of solution to 8.0 and sonicated for 60 min. The mixture was stirred overnight and then precipitated. Using distilled water and absolute ethanol to wash the precipitate for some times and dried at 60 °C for 12 h. Finally, the light yellow precipitate was calcined at 400 °C for 2 h with a heating rate of 1 °C/min in air to obtain  $\text{Bi}_2\text{O}_3$  solid rods.

Finally, the Z-scheme  $\text{MoS}_2/\text{Bi}_2\text{O}_3$  heterojunction was constructed a facile and practical hydrothermal method. 0.1 g  $\text{Bi}_2\text{O}_3$  and a certain

concentration of MoS<sub>2</sub> were put into 40 mL absolute ethanol and stirred for 30 min. Then mixture was sonicated for 30 min and moved into a Teflon-lined autoclave heated at 140 °C for 6 h. In the same way, the preparation of Z-scheme MoS<sub>2</sub>/Bi<sub>2</sub>O<sub>3</sub> heterojunction with different mass ratios of MoS<sub>2</sub> to Bi<sub>2</sub>O<sub>3</sub> (abbreviated as 5%, 10%, 15% 20% and 25% of MoS<sub>2</sub>/Bi<sub>2</sub>O<sub>3</sub>) were got.

### **3. Characterization**

In order to analyze the crystal structure and phase purity, the prepared samples are characterized by a D8ADVANCE X-ray diffractometer (Bruker AXS Co., Germany) at room temperature, and record the X-ray diffraction (XRD) patterns at 10-80° with a scanning step of 7°/min. For getting the energy dispersive x-ray spectra (EDX), an EDS Inca X-Max (Oxford, UK) is used. It uses an S-4800 field emission SEM (SEM, Hitachi, Japan) to observe the morphology and the elemental mapping of as-prepared samples with a scanning electronic microscopy (SEM). The transmission electron microscopy (TEM) of samples is investigated on JEM-2100F transmission electron microscopy (JEOL, Japan). Using Thermo ESCALAB 250X (America) to describe the X-ray photoelectron spectroscopy (XPS). The diffuse reflectance spectra (DRS) (UV-2450; Shimadzu, Japan) is also performed to observe the light absorption and energy band features of photocatalysts. The surface area, pore volume and average pore size of these photocatalysts are examined by a NOVA 3020e analytical system (Quantachrome Co., U.S.A.), and it can attain the Brunauer-Emmett-Teller (BET) measure. A VersaSTAT 3 electrochemical station (Princeton Applied Research, American) is used in this part to research transient photocurrent and electrochemical impedance spectroscopy (EIS). For analyzing the intermediate degradation product, the mass spectrometry is carried out using a HPLC-MS instrument composed of Perkin-Elmer Norwalk, CT) Series 2000

HPLC with the Finnigan MAT900 mass. In the end, electron spin resonance (ESR) spectroscopy is gone on a Bruker A300 ESR spectrometer at room temperature.

#### **4. Photocatalytic and trapping experiments**

To evaluate the photocatalytic activities of as-prepared various samples, the degradation experiments of MBT, TC and RhB are carried out as bellow. A 250 W xenon lamp with a 420 nm cutoff filter is applied as a light source. The photocatalytic experiments are as following: 50 mg photocatalyst is added into 100 mL solution which contains 10 mg/mL MBT. Then the solution is stirred for 30 min to achieve the adsorption–desorption equilibrium. After that, the solution of 5 mL is sampled and centrifuged at 20 min intervals. Meanwhile, the photocatalytic degradation of TC and RhB are also processed within the same experiment conditions except for the use of 20 mg/mL TC and 10 mg/mL RhB. Furthermore, the active species trapping experiments are as same as the above photocatalytic experiments, only add 1 mL triethanolamine (TEOA, a quencher of  $h^+$ ), 1 mL isopropanol (IPA, a quencher of  $\cdot OH$ ), and 0.176 g Vitamin c (Vc, a quencher of  $\cdot O_2^-$ ) respectively to catch various radicals during the photocatalytic reducing course. Then an UV-vis spectrophotometer is used to monitor the supernatant.

#### **5. Photoelectrochemical measurement**

In order to detect the photoelectrochemical performance, the Z-scheme  $MoS_2/Bi_2O_3$  heterojunction is tested by the photocurrent response and electrochemical impedance spectroscopy (EIS) in a 450FRA 2A electrochemical station. Shortly, 0.05 g photocatalyst and 0.01 g polyvinyl pyrrolidone (PVP) are dissolved in 3 mL ethanol and 30  $\mu L$  oleic acid. Then 0.05 ml of this mixture is dipped onto FTO substrates ( $1.0\text{ cm}^2$ ) and regarded as corresponding working electrodes. And a Pt plate and a saturated Ag/AgCl electrode are as the counter electrode and

the reference electrode respectively. In addition, a 0.5 M  $\text{Na}_2\text{SO}_4$  aqueous solution was used as the electrolyte.

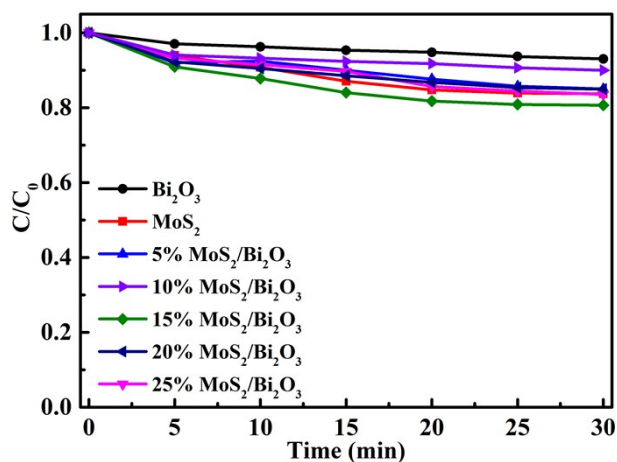

**Fig. S1.** The adsorption curves of MBT over different photocatalysts.

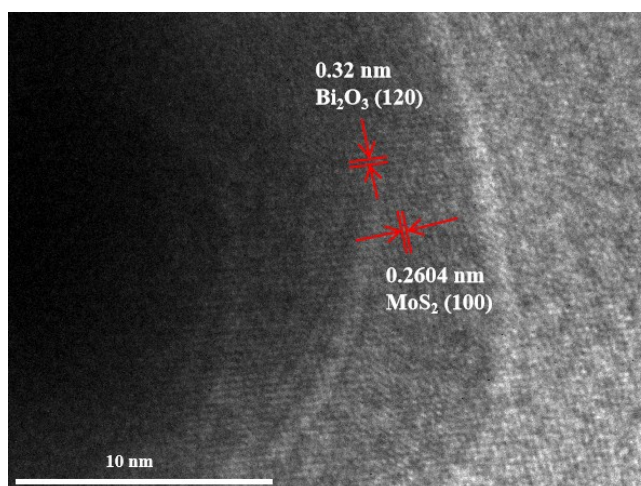

**Fig. S2.** HRTEM images of  $\text{MoS}_2/\text{Bi}_2\text{O}_3$  heterojunction.

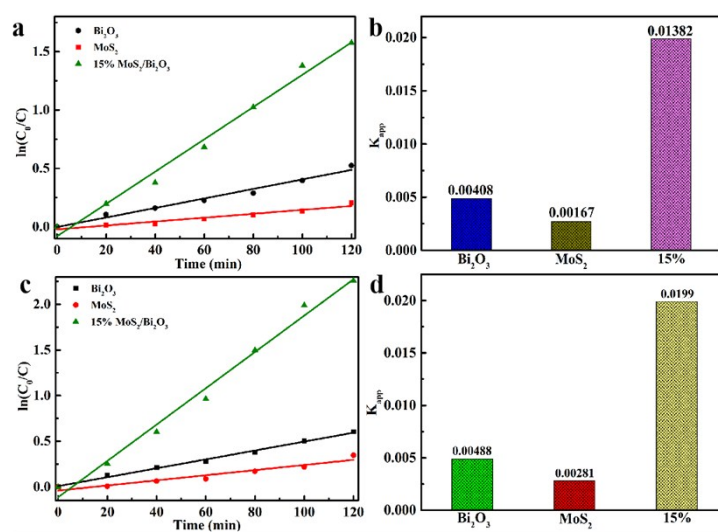

**Fig. S3.** (a) The pseudo-first-order reaction kinetics of TC; (b) Values of reaction rate constants of TC over the as-prepared samples; (c) The pseudo-first-order reaction kinetics of RhB; (d) Values of reaction rate constants of RhB over the as-prepared samples.
